# Supplementary material
Source: ML conference proceedings conference paper supplement (https://proceedings.mlr.press/v80/tong18a.html)
Supplement: Supplementary file 2 [file tong18a-supp.pdf]

---

# Adversarial Regression with Multiple Learners

## Supplementary Material

---

Liang Tong   Sixie Yu   Scott Alfeld   Yevgeniy Vorobeychik

### A. Proofs

#### A.1. Proof of Lemma 1

*Proof.* We derive the best response of the attacker by using the first order condition. Let  $\nabla_{\mathbf{X}'} c_a(\{\boldsymbol{\theta}_i\}_{i=1}^n, \mathbf{X}')$  denote the gradient of  $c_a$  with respect to  $\mathbf{X}'$ . Then

$$\nabla_{\mathbf{X}'} c_a = 2 \sum_{i=1}^n (\mathbf{X}' \boldsymbol{\theta}_i - \mathbf{z}) \boldsymbol{\theta}_i^\top + 2\lambda(\mathbf{X}' - X).$$

Due to convexity of  $c_a$ , let  $\nabla_{\mathbf{X}'} c_a = \mathbf{0}$ , we have

$$\mathbf{X}^* = (\lambda \mathbf{X} + \mathbf{z} \sum_{i=1}^n \boldsymbol{\theta}_i^\top) (\lambda \mathbf{I} + \sum_{i=1}^n \boldsymbol{\theta}_i \boldsymbol{\theta}_i^\top)^{-1}.$$

□

#### A.2. Proof of Lemma 2

*Proof.* 1. First, we prove that  $\mathbf{A}_n = \lambda \mathbf{I} + \sum_{i=1}^n \boldsymbol{\theta}_i \boldsymbol{\theta}_i^\top$  is invertible, and its inverse matrix,  $\mathbf{A}_n^{-1}$ , is positive definite by using mathematical induction.

When  $n = 1$ ,  $\mathbf{A}_1 = \lambda \mathbf{I} + \boldsymbol{\theta}_1 \boldsymbol{\theta}_1^\top$ . As  $\lambda \mathbf{I}$  is an invertible square matrix and  $\boldsymbol{\theta}_1$  is a column vector, by using *Sherman-Morrison formula*,  $\mathbf{A}_1$  is invertible.

$$\mathbf{A}_1^{-1} = \frac{1}{\lambda} \left( \mathbf{I} - \frac{\boldsymbol{\theta}_1 \boldsymbol{\theta}_1^\top}{\lambda + \boldsymbol{\theta}_1^\top \boldsymbol{\theta}_1} \right).$$

For any non-zero column vector  $\mathbf{u}$ , we have

$$\mathbf{u}^\top \mathbf{A}_1^{-1} \mathbf{u} = \frac{\lambda \mathbf{u}^\top \mathbf{u} + \mathbf{u}^\top \boldsymbol{\theta}_1 \boldsymbol{\theta}_1^\top \boldsymbol{\theta}_1 - \mathbf{u}^\top \boldsymbol{\theta}_1 \boldsymbol{\theta}_1^\top \mathbf{u}}{\lambda(\lambda + \boldsymbol{\theta}_1^\top \boldsymbol{\theta}_1)}.$$

As  $\mathbf{u}^\top \mathbf{u} > 0$  and  $\lambda > 0$ , according to *Cauchy-Schwarz inequality*,

$$\mathbf{u}^\top \boldsymbol{\theta}_1 \boldsymbol{\theta}_1^\top \boldsymbol{\theta}_1 \geq \mathbf{u}^\top \boldsymbol{\theta}_1 \boldsymbol{\theta}_1^\top \mathbf{u},$$

Then,  $\mathbf{u}^\top \mathbf{A}_1^{-1} \mathbf{u} > 0$ . Thus,  $\mathbf{A}_1^{-1}$  is a positive definite matrix.

We then assume that when  $n = k (k \geq 1)$ ,  $\mathbf{A}_k$  is invertible and  $\mathbf{A}_k^{-1}$  is positive definite. Then, when  $n = k + 1$ ,

$$\mathbf{A}_{k+1} = \mathbf{A}_k + \boldsymbol{\theta}_{k+1} \boldsymbol{\theta}_{k+1}^\top.$$

As  $\mathbf{A}_k$  is invertible,  $\boldsymbol{\theta}_{k+1}$  is a column vector. By using *Sherman-Morrison formula*, we have that  $\mathbf{A}_{k+1}$  is invertible, and

$$\mathbf{A}_{k+1}^{-1} = \mathbf{A}_k^{-1} - \frac{\mathbf{A}_k^{-1} \boldsymbol{\theta}_{k+1} \boldsymbol{\theta}_{k+1}^\top \mathbf{A}_k^{-1}}{1 + \boldsymbol{\theta}_{k+1}^\top \mathbf{A}_k^{-1} \boldsymbol{\theta}_{k+1}}.$$

Then,

$$\mathbf{u}^\top \mathbf{A}_{k+1}^{-1} \mathbf{u} = \frac{\mathbf{u}^\top \mathbf{A}_k^{-1} \mathbf{u} + \mathbf{u}^\top \mathbf{A}_k^{-1} \mathbf{u} \cdot \boldsymbol{\theta}_{k+1}^\top \mathbf{A}_k^{-1} \boldsymbol{\theta}_{k+1} - \mathbf{u}^\top \mathbf{A}_k^{-1} \boldsymbol{\theta}_{k+1} \cdot \boldsymbol{\theta}_{k+1}^\top \mathbf{A}_k^{-1} \mathbf{u}}{1 + \boldsymbol{\theta}_{k+1}^\top \mathbf{A}_k^{-1} \boldsymbol{\theta}_{k+1}}$$

As  $\mathbf{A}_k^{-1}$  is a positive definite matrix, we have  $\mathbf{u}^\top \mathbf{A}_k^{-1} \mathbf{u} > 0$  and  $\boldsymbol{\theta}_{k+1}^\top \mathbf{A}_k^{-1} \boldsymbol{\theta}_{k+1} > 0$ . By using *Extended Cauchy-Schwarz inequality*, we have

$$\mathbf{u}^\top \mathbf{A}_k^{-1} \mathbf{u} \boldsymbol{\theta}_{k+1}^\top \mathbf{A}_k^{-1} \boldsymbol{\theta}_{k+1} > \mathbf{u}^\top \mathbf{A}_k^{-1} \boldsymbol{\theta}_{k+1} \boldsymbol{\theta}_{k+1}^\top \mathbf{A}_k^{-1} \mathbf{u}.$$

Then,  $\mathbf{A}_{k+1}^{-1}$  is positive definite. Hence,  $\mathbf{A}_n = \lambda \mathbf{I} + \sum_{i=1}^n \boldsymbol{\theta}_i \boldsymbol{\theta}_i^\top$  is invertible, and  $\mathbf{A}_n^{-1}$  is positive definite. Similarly, we can prove that  $\mathbf{A}_{-i}$  is invertible, and  $\mathbf{A}_{-i}^{-1}$  is positive definite.

2. We have proved that  $\mathbf{A}_n$  and  $\mathbf{A}_{-i}$  are invertible. Then, the result can be obtained by using *Sherman-Morrison formula*.
3. Let  $\mathbf{A}_{-i,-j} = \mathbf{A}_{-i} - \boldsymbol{\theta}_j \boldsymbol{\theta}_j^\top$ . As  $\mathbf{A}_{-i,-j}$  is a symmetric matrix, its inverse,  $\mathbf{A}_{-i,-j}^{-1}$  is also symmetric. Using a similar approach to the one above, we can prove that  $\mathbf{A}_{-i,-j}$  is invertible and  $\mathbf{A}_{-i,-j}^{-1}$  is positive definite. By using *Sherman-Morrison formula*, we have

$$\mathbf{A}_{-i}^{-1} = \mathbf{A}_{-i,-j}^{-1} - \frac{\mathbf{A}_{-i,-j}^{-1} \boldsymbol{\theta}_j \boldsymbol{\theta}_j^\top \mathbf{A}_{-i,-j}^{-1}}{1 + \boldsymbol{\theta}_j^\top \mathbf{A}_{-i,-j}^{-1} \boldsymbol{\theta}_j}.$$

Then,

$$\begin{aligned} \boldsymbol{\theta}_i^\top \mathbf{A}_{-i}^{-1} \boldsymbol{\theta}_i &= \boldsymbol{\theta}_i^\top \mathbf{A}_{-i,-j}^{-1} \boldsymbol{\theta}_i - \frac{\boldsymbol{\theta}_i^\top \mathbf{A}_{-i,-j}^{-1} \boldsymbol{\theta}_j \cdot \boldsymbol{\theta}_j^\top \mathbf{A}_{-i,-j}^{-1} \boldsymbol{\theta}_i}{1 + \boldsymbol{\theta}_j^\top \mathbf{A}_{-i,-j}^{-1} \boldsymbol{\theta}_j} \\ &= \boldsymbol{\theta}_i^\top \mathbf{A}_{-i,-j}^{-1} \boldsymbol{\theta}_i - \frac{(\boldsymbol{\theta}_i^\top \mathbf{A}_{-i,-j}^{-1} \boldsymbol{\theta}_j)^2}{1 + \boldsymbol{\theta}_j^\top \mathbf{A}_{-i,-j}^{-1} \boldsymbol{\theta}_j} \\ &\leq \boldsymbol{\theta}_i^\top \mathbf{A}_{-i,-j}^{-1} \boldsymbol{\theta}_i. \end{aligned}$$

We then iteratively apply *Sherman-Morrison formula* and get

$$\begin{aligned} \boldsymbol{\theta}_i^\top \mathbf{A}_{-i}^{-1} \boldsymbol{\theta}_i &\leq \boldsymbol{\theta}_i^\top \mathbf{A}_0^{-1} \boldsymbol{\theta}_i \\ &= \frac{1}{\lambda} \boldsymbol{\theta}_i^\top \boldsymbol{\theta}_i. \end{aligned}$$

□

### A.3. Proof of Theorem 2

*Proof.* As presented in Lemma 3, we have

$$\ell(\mathbf{X}^* \boldsymbol{\theta}_i, \mathbf{y}) \leq \ell(\mathbf{B}_{-i} \mathbf{A}_{-i}^{-1} \boldsymbol{\theta}_i, \mathbf{y}) + \frac{1}{\lambda^2} \|\mathbf{z} - \mathbf{y}\|_2^2 (\boldsymbol{\theta}_i^\top \boldsymbol{\theta}_i)^2.$$

By using *Sherman-Morrison formula*,

$$\begin{aligned} \ell(\mathbf{B}_{-i} \mathbf{A}_{-i}^{-1} \boldsymbol{\theta}_i, \mathbf{y}) &= \|\mathbf{B}_{-i} (\mathbf{A}_{-i,-j}^{-1} - \frac{\mathbf{A}_{-i,-j}^{-1} \boldsymbol{\theta}_j \boldsymbol{\theta}_j^\top \mathbf{A}_{-i,-j}^{-1}}{1 + \boldsymbol{\theta}_j^\top \mathbf{A}_{-i,-j}^{-1} \boldsymbol{\theta}_j}) \boldsymbol{\theta}_i - \mathbf{y}\|_2^2 \\ &\leq \|\frac{\mathbf{B}_{-i} \mathbf{A}_{-i,-j}^{-1} \boldsymbol{\theta}_i}{1 + \boldsymbol{\theta}_j^\top \mathbf{A}_{-i,-j}^{-1} \boldsymbol{\theta}_j} - \mathbf{y}\|_2^2 + \Delta_1(\boldsymbol{\theta}) \end{aligned}$$

where  $j \neq i$ , and  $\Delta_1(\boldsymbol{\theta})$  is a continuous function of  $\boldsymbol{\theta} = \{\boldsymbol{\theta}_i\}_{i=1}^n$ . As the action space  $\Theta$  is bounded, then  $0 \leq \Delta_1(\boldsymbol{\theta}) < \infty$ . Hence, we have

$$\begin{aligned}
 \ell(\mathbf{B}_{-i} \mathbf{A}_{-i}^{-1} \boldsymbol{\theta}_i, \mathbf{y}) &\leq \left\| \frac{\mathbf{B}_{-i} \mathbf{A}_{-i,-j}^{-1} \boldsymbol{\theta}_i}{1 + \boldsymbol{\theta}_j^\top \mathbf{A}_{-i,-j}^{-1} \boldsymbol{\theta}_j} - \mathbf{y} \right\|_2^2 + \Delta_1(\boldsymbol{\theta}) \\
 &= \left\| \frac{\mathbf{B}_{-i} \mathbf{A}_{-i,-j}^{-1} \boldsymbol{\theta}_i - \mathbf{y} - \boldsymbol{\theta}_j^\top \mathbf{A}_{-i,-j}^{-1} \boldsymbol{\theta}_j \mathbf{y}}{1 + \boldsymbol{\theta}_j^\top \mathbf{A}_{-i,-j}^{-1} \boldsymbol{\theta}_j} \right\|_2^2 + \Delta_1(\boldsymbol{\theta}) \\
 &\leq \|\mathbf{B}_{-i} \mathbf{A}_{-i,-j}^{-1} \boldsymbol{\theta}_i - \mathbf{y} - \boldsymbol{\theta}_j^\top \mathbf{A}_{-i,-j}^{-1} \boldsymbol{\theta}_j \mathbf{y}\|_2^2 + \Delta_1(\boldsymbol{\theta}) \\
 &= \|(\mathbf{B}_{-i,-j} + \mathbf{z} \boldsymbol{\theta}_j^\top) \mathbf{A}_{-i,-j}^{-1} \boldsymbol{\theta}_i - \mathbf{y} - \boldsymbol{\theta}_j^\top \mathbf{A}_{-i,-j}^{-1} \boldsymbol{\theta}_j \mathbf{y}\|_2^2 + \Delta_1(\boldsymbol{\theta}) \\
 &= \|(\mathbf{B}_{-i,-j} \mathbf{A}_{-i,-j}^{-1} \boldsymbol{\theta}_i - \mathbf{y}) + (\mathbf{z} - \mathbf{y}) \boldsymbol{\theta}_j^\top \mathbf{A}_{-i,-j}^{-1} \boldsymbol{\theta}_i + \boldsymbol{\theta}_j^\top \mathbf{A}_{-i,-j}^{-1} (\boldsymbol{\theta}_i - \boldsymbol{\theta}_j) \mathbf{y}\|_2^2 + \Delta_1(\boldsymbol{\theta}) \\
 &\leq \ell(\mathbf{B}_{-i,-j} \mathbf{A}_{-i,-j}^{-1} \boldsymbol{\theta}_i, \mathbf{y}) + \|(\mathbf{z} - \mathbf{y})\|_2^2 (\boldsymbol{\theta}_j^\top \mathbf{A}_{-i,-j}^{-1} \boldsymbol{\theta}_i)^2 + \Delta_2(\boldsymbol{\theta})
 \end{aligned}$$

where  $\Delta_2(\boldsymbol{\theta})$  is a continuous function of  $\boldsymbol{\theta}$  and  $0 \leq \Delta_2(\boldsymbol{\theta}) < \infty$ . Let  $\mathbf{A}_{-i,-j,-k} = \mathbf{A}_{-i,-j} - \boldsymbol{\theta}_k \boldsymbol{\theta}_k^\top$ , then, similarly,  $(\boldsymbol{\theta}_j^\top \mathbf{A}_{-i,-j}^{-1} \boldsymbol{\theta}_i)^2$  can be further relaxed as follows.

$$\begin{aligned}
 (\boldsymbol{\theta}_j^\top \mathbf{A}_{-i,-j}^{-1} \boldsymbol{\theta}_i)^2 &= (\boldsymbol{\theta}_j^\top (\mathbf{A}_{-i,-j,-k}^{-1} - \frac{\mathbf{A}_{-i,-j,-k}^{-1} \boldsymbol{\theta}_k \boldsymbol{\theta}_k^\top \mathbf{A}_{-i,-j,-k}^{-1}}{1 + \boldsymbol{\theta}_k^\top \mathbf{A}_{-i,-j,-k}^{-1} \boldsymbol{\theta}_k}) \boldsymbol{\theta}_i)^2 \\
 &\leq (\boldsymbol{\theta}_j^\top \mathbf{A}_{-i,-j,-k}^{-1} \boldsymbol{\theta}_i)^2 + \Delta_3(\boldsymbol{\theta})
 \end{aligned}$$

where  $0 \leq \Delta_3(\boldsymbol{\theta}) < \infty$ , using the same approach,  $(\boldsymbol{\theta}_j^\top \mathbf{A}_{-i,-j}^{-1} \boldsymbol{\theta}_i)^2$  can be further and iteratively relaxed as follows,

$$\begin{aligned}
 (\boldsymbol{\theta}_j^\top \mathbf{A}_{-i,-j}^{-1} \boldsymbol{\theta}_i)^2 &\leq (\boldsymbol{\theta}_j^\top \mathbf{A}_0^{-1} \boldsymbol{\theta}_i)^2 + \Delta_4(\boldsymbol{\theta}) \\
 &= \frac{1}{\lambda^2} (\boldsymbol{\theta}_j^\top \boldsymbol{\theta}_i)^2 + \Delta_4(\boldsymbol{\theta})
 \end{aligned}$$

where  $0 \leq \Delta_4(\boldsymbol{\theta}) < \infty$ . Combining the results above, we can iteratively relax  $\ell(\mathbf{B}_{-i} \mathbf{A}_{-i}^{-1} \boldsymbol{\theta}_i, \mathbf{y})$  as follows,

$$\begin{aligned}
 \ell(\mathbf{B}_{-i} \mathbf{A}_{-i}^{-1} \boldsymbol{\theta}_i, \mathbf{y}) &\leq \ell(\mathbf{B}_{-i,-j} \mathbf{A}_{-i,-j}^{-1} \boldsymbol{\theta}_i, \mathbf{y}) + \frac{1}{\lambda^2} \|\mathbf{z} - \mathbf{y}\|_2^2 (\boldsymbol{\theta}_j^\top \boldsymbol{\theta}_i)^2 + \Delta_5(\boldsymbol{\theta}) \\
 &\leq \ell(\mathbf{X} \boldsymbol{\theta}_i, \mathbf{y}) + \frac{1}{\lambda^2} \|\mathbf{z} - \mathbf{y}\|_2^2 \sum_{j \neq i} (\boldsymbol{\theta}_j^\top \boldsymbol{\theta}_i)^2 + \Delta(\boldsymbol{\theta})
 \end{aligned}$$

where  $0 \leq \Delta_5(\boldsymbol{\theta}) < \infty$  and  $0 \leq \Delta(\boldsymbol{\theta}) < \infty$ . Then,

$$\begin{aligned}
 \ell(\mathbf{X}^* \boldsymbol{\theta}_i, \mathbf{y}) &\leq \ell(\mathbf{B}_{-i} \mathbf{A}_{-i}^{-1} \boldsymbol{\theta}_i, \mathbf{y}) + \frac{1}{\lambda^2} \|\mathbf{z} - \mathbf{y}\|_2^2 (\boldsymbol{\theta}_i^\top \boldsymbol{\theta}_i)^2 \\
 &\leq \ell(\mathbf{X} \boldsymbol{\theta}_i, \mathbf{y}) + \frac{1}{\lambda^2} \|\mathbf{z} - \mathbf{y}\|_2^2 \sum_{j=1}^n (\boldsymbol{\theta}_j^\top \boldsymbol{\theta}_i)^2 + \Delta(\boldsymbol{\theta}).
 \end{aligned}$$

Hence,

$$\begin{aligned}
 c_i(\boldsymbol{\theta}_i, \boldsymbol{\theta}_{-i}) &= \beta \ell(\mathbf{X}^* \boldsymbol{\theta}_i, \mathbf{y}) + (1 - \beta) \ell(\mathbf{X} \boldsymbol{\theta}_i, \mathbf{y}) \\
 &\leq \ell(\mathbf{X} \boldsymbol{\theta}_i, \mathbf{y}) + \frac{\beta}{\lambda^2} \|\mathbf{z} - \mathbf{y}\|_2^2 \sum_{j=1}^n (\boldsymbol{\theta}_j^\top \boldsymbol{\theta}_i)^2 + \epsilon
 \end{aligned}$$

where  $\epsilon$  is a constant such that  $\epsilon = \beta * \max_{\boldsymbol{\theta}} \{\Delta(\boldsymbol{\theta})\} < \infty$ . □

#### A.4. Proof of Theorem 4

*Proof.* We have known that  $\langle \mathcal{N}, \Theta, (\tilde{c}_i) \rangle$  has at least NE, and each learner has an nonempty, compact and convex action space  $\Theta$ . Hence, we can apply Theorem 2 and Theorem 6 of Rosen (1965). That is, for some fixed  $\{r_i\}_i^n$  ( $0 < r_i <$

1,  $\sum_{i=1}^n r_i = 1$ ), if the matrix in Eq. (1) is positive definite, then  $\langle \mathcal{N}, \Theta, (\tilde{c}_i) \rangle$  has a unique NE.

$$Jr(\boldsymbol{\theta}) = \begin{bmatrix} r_1 \nabla_{\boldsymbol{\theta}_1, \boldsymbol{\theta}_1} \tilde{c}_1(\boldsymbol{\theta}) & \cdots & r_1 \nabla_{\boldsymbol{\theta}_1, \boldsymbol{\theta}_n} \tilde{c}_1(\boldsymbol{\theta}) \\ \vdots & & \vdots \\ r_n \nabla_{\boldsymbol{\theta}_n, \boldsymbol{\theta}_1} \tilde{c}_n(\boldsymbol{\theta}) & \cdots & r_n \nabla_{\boldsymbol{\theta}_n, \boldsymbol{\theta}_n} \tilde{c}_n(\boldsymbol{\theta}) \end{bmatrix} \quad (1)$$

By taking second-order derivatives, we have

$$\nabla_{\boldsymbol{\theta}_i, \boldsymbol{\theta}_i} \tilde{c}_i(\boldsymbol{\theta}) = 2\mathbf{X}^\top \mathbf{X} + \frac{2\beta \|\mathbf{z} - \mathbf{y}\|_2^2}{\lambda^2} (4\boldsymbol{\theta}_i \boldsymbol{\theta}_i^\top + 2\boldsymbol{\theta}_i^\top \boldsymbol{\theta}_i \mathbf{I} + \sum_{j \neq i} \boldsymbol{\theta}_j \boldsymbol{\theta}_j^\top)$$

and

$$\nabla_{\boldsymbol{\theta}_i, \boldsymbol{\theta}_j} \tilde{c}_i(\boldsymbol{\theta}) = \frac{2\beta \|\mathbf{z} - \mathbf{y}\|_2^2}{\lambda^2} (\boldsymbol{\theta}_i^\top \boldsymbol{\theta}_j \mathbf{I} + \boldsymbol{\theta}_j \boldsymbol{\theta}_i^\top)$$

We first let  $r_1 = r_2 = \dots = r_n = \frac{1}{n}$  and decompose  $Jr(\boldsymbol{\theta})$  as follows,

$$Jr(\boldsymbol{\theta}) = \frac{2}{n} \mathbf{P} + \frac{2\beta \|\mathbf{z} - \mathbf{y}\|_2^2}{\lambda^2 n} (\mathbf{Q} + \mathbf{S} + \mathbf{T}), \quad (2)$$

where  $\mathbf{P}$  and  $\mathbf{Q}$  are *block diagonal matrices* such that  $\mathbf{P}_{ii} = \mathbf{X}^\top \mathbf{X}$ ,  $\mathbf{P}_{ij} = \mathbf{0}$ ,  $\mathbf{Q}_{ii} = 4\boldsymbol{\theta}_i \boldsymbol{\theta}_i^\top + \boldsymbol{\theta}_i^\top \boldsymbol{\theta}_i \mathbf{I}$  and  $\mathbf{Q}_{ij} = \mathbf{0}$ ,  $\forall i, j \in \mathcal{N}, j \neq i$ .  $\mathbf{S}$  and  $\mathbf{T}$  are *block symmetric matrices* such that  $\mathbf{S}_{ii} = \boldsymbol{\theta}_i^\top \boldsymbol{\theta}_i \mathbf{I}$ ,  $\mathbf{S}_{ij} = \boldsymbol{\theta}_i^\top \boldsymbol{\theta}_j \mathbf{I}$ ,  $\mathbf{T}_{ii} = \sum_{j \neq i} \boldsymbol{\theta}_j \boldsymbol{\theta}_j^\top$  and  $\mathbf{T}_{ij} = \boldsymbol{\theta}_j \boldsymbol{\theta}_i^\top$ ,  $\forall i, j \in \mathcal{N}, j \neq i$ .

Next, we prove that  $\mathbf{P}$  is *positive definite*, and  $\mathbf{Q}$ ,  $\mathbf{S}$  and  $\mathbf{T}$  are *positive semi-definite*. Let  $\mathbf{u} = [\mathbf{u}_1^\top, \dots, \mathbf{u}_n^\top]^\top$  be an  $nd \times 1$  vector, where  $\mathbf{u}_i \in \mathbb{R}^{d \times 1}$  ( $i \in \mathcal{N}$ ) are not all zero vectors.

1.  $\mathbf{u}^\top \mathbf{P} \mathbf{u} = \sum_{i=1}^n \mathbf{u}_i^\top \mathbf{X}^\top \mathbf{X} \mathbf{u}_i = \sum_{i=1}^n \|\mathbf{X} \mathbf{u}_i\|_2^2$ . As the columns of  $\mathbf{X}$  are linearly independent and  $\mathbf{u}_i$  are not all zero vectors, there exists at least one  $\mathbf{u}_i$  such that  $\mathbf{X} \mathbf{u}_i \neq \mathbf{0}$ . Hence,  $\mathbf{u}^\top \mathbf{P} \mathbf{u} > 0$  which indicates that  $\mathbf{P}$  is positive definite.
2. Similarly,  $\mathbf{u}^\top \mathbf{Q} \mathbf{u} \geq 0$  which indicates that  $\mathbf{Q}$  is a positive semi-definite matrix.
3. Let's  $\mathbf{S}^* \in \mathbb{R}^{n \times n}$  be a symmetric matrix such that  $\mathbf{S}_{ii}^* = \boldsymbol{\theta}_i^\top \boldsymbol{\theta}_i$  and  $\mathbf{S}_{ij}^* = \boldsymbol{\theta}_i^\top \boldsymbol{\theta}_j$ ,  $\forall i, j \in \mathcal{N}, j \neq i$ . Hence,  $\mathbf{S}_{ij} = \mathbf{S}_{ij}^* \mathbf{I}$ ,  $\forall i, j \in \mathcal{N}$ . Note that  $\mathbf{S}^* = [\boldsymbol{\theta}_1, \boldsymbol{\theta}_2, \dots, \boldsymbol{\theta}_n]^\top [\boldsymbol{\theta}_1, \boldsymbol{\theta}_2, \dots, \boldsymbol{\theta}_n]$  is a positive semi-definite matrix, as it is also symmetric, there exists at least one lower triangular matrix  $\mathbf{L}^* \in \mathbb{R}^{n \times n}$  with non-negative diagonal elements (Higham, 1990) such that

$$\mathbf{S}^* = \mathbf{L}^* \mathbf{L}^{*\top} \text{ (Cholesky Decomposition)}$$

Let  $\mathbf{L}$  be a block matrix such that  $\mathbf{L}_{ij} = \mathbf{L}_{ij}^* \mathbf{I}$ ,  $\forall i, j \in \mathcal{N}$ . Therefore,  $(\mathbf{L} \mathbf{L}^\top)_{ij} = (\mathbf{L}^* \mathbf{L}^{*\top})_{ij} \mathbf{I} = \mathbf{S}_{ij}^* \mathbf{I} = \mathbf{S}_{ij}$  which indicates that  $\mathbf{S} = \mathbf{L} \mathbf{L}^\top$  is a positive semi-definite matrix.

4. Since

$$\begin{aligned} \mathbf{u}^\top \mathbf{T} \mathbf{u} &= \sum_{i=1}^n \sum_{j \neq i} (\mathbf{u}_i^\top \boldsymbol{\theta}_j)^2 + \sum_{i=1}^n \sum_{j \neq i} (\mathbf{u}_i^\top \boldsymbol{\theta}_j)(\mathbf{u}_j^\top \boldsymbol{\theta}_i) \\ &= \sum_{i=1}^n \sum_{j \neq i} \left[ \frac{1}{2} (\mathbf{u}_i^\top \boldsymbol{\theta}_j)^2 + \frac{1}{2} (\mathbf{u}_j^\top \boldsymbol{\theta}_i)^2 + (\mathbf{u}_i^\top \boldsymbol{\theta}_j)(\mathbf{u}_j^\top \boldsymbol{\theta}_i) \right] \\ &= \frac{1}{2} \sum_{i=1}^n \sum_{j \neq i} (\mathbf{u}_i^\top \boldsymbol{\theta}_j + \mathbf{u}_j^\top \boldsymbol{\theta}_i)^2 \\ &\geq 0, \end{aligned}$$

$\mathbf{T}$  is a positive semi-definite matrix.

Combining the results above,  $Jr(\boldsymbol{\theta})$  is a positive definite matrix which indicates that  $\langle \mathcal{N}, \Theta, (\tilde{c}_i) \rangle$  has a unique NE. As Theorem 3 points out, the game has at least one symmetric NE. Therefore, the NE is unique and must be symmetric.  $\square$

## B. Experiment Results

### B.1. Supplementary results for the redwine dataset

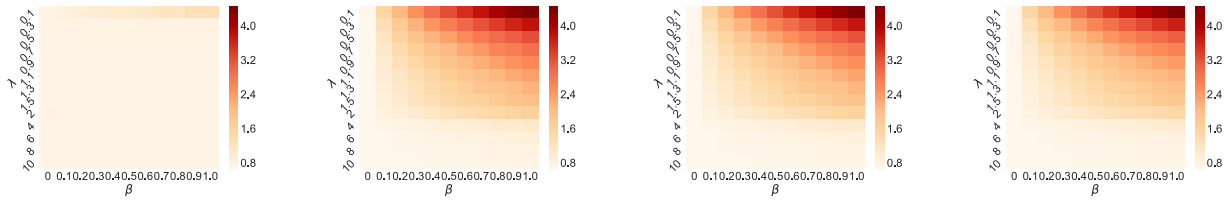

Figure 1. Overestimated  $\mathbf{z}$ ,  $\hat{\lambda} = 0.5$ ,  $\hat{\beta} = 0.8$ . The average RMSE across different values of actual  $\lambda$  and  $\beta$  on redwine dataset. From left to right: *MLSG*, *Lasso*, *Ridge*, *OLS*.

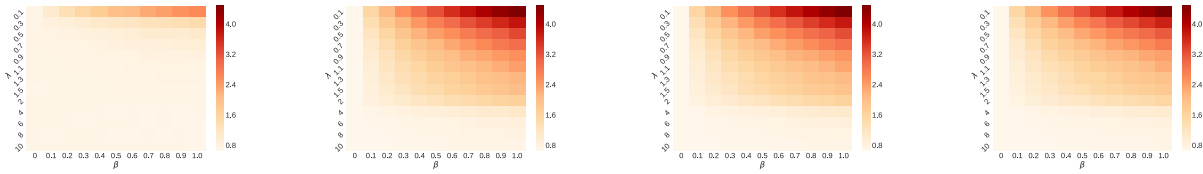

Figure 2. Overestimated  $\mathbf{z}$ ,  $\hat{\lambda} = 1.5$ ,  $\hat{\beta} = 0.8$ . The average RMSE across different values of actual  $\lambda$  and  $\beta$  on redwine dataset. From left to right: *MLSG*, *Lasso*, *Ridge*, *OLS*.

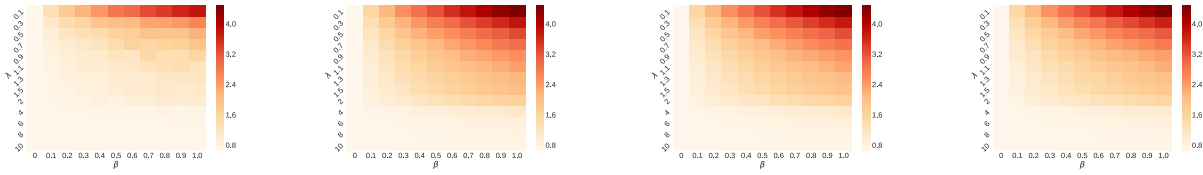

Figure 3. Underestimated  $\mathbf{z}$ ,  $\hat{\lambda} = 1.5$ ,  $\hat{\beta} = 0.8$ . The average RMSE across different values of actual  $\lambda$  and  $\beta$  on redwine dataset. From left to right: *MLSG*, *Lasso*, *Ridge*, *OLS*.

### B.2. Supplementary results for the boston dataset

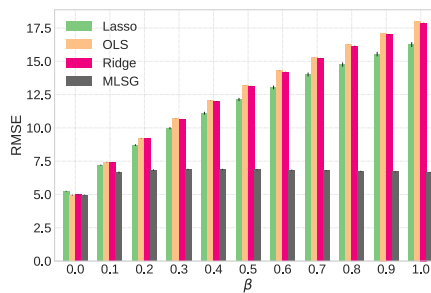

Figure 4. The defender knows  $\lambda$ ,  $\beta$ , and  $\mathbf{z}$ . RMSE of  $\mathbf{y}'$  and  $\mathbf{y}$  on boston dataset. The defender knows  $\lambda$ ,  $\beta$ , and  $\mathbf{z}$ .

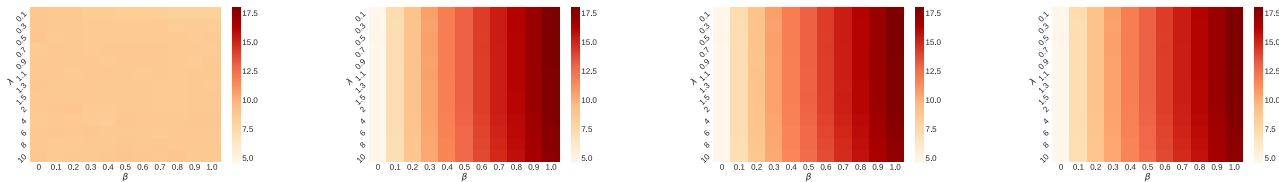

Figure 5. Overestimated  $\mathbf{z}$ ,  $\hat{\lambda} = 0.3$ ,  $\hat{\beta} = 0.8$ . The average RMSE across different values of actual  $\lambda$  and  $\beta$  on boston dataset. From left to right: *MLSG*, *Lasso*, *Ridge*, *OLS*.

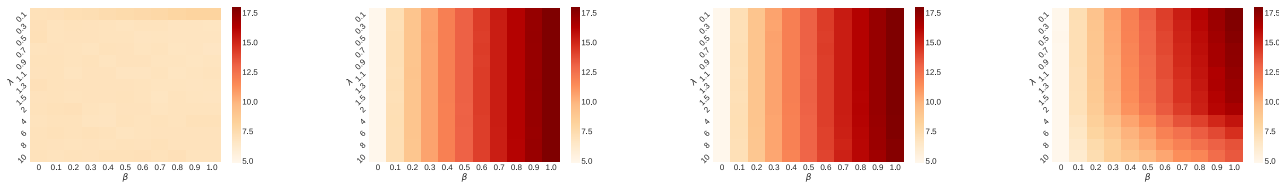

Figure 6. Underestimated  $\mathbf{z}$ ,  $\hat{\lambda} = 0.3$ ,  $\hat{\beta} = 0.8$ . The average RMSE across different values of actual  $\lambda$  and  $\beta$  on boston dataset. From left to right: *MLSG*, *Lasso*, *Ridge*, *OLS*.

**B.3. Supplementary results for the PDF dataset**

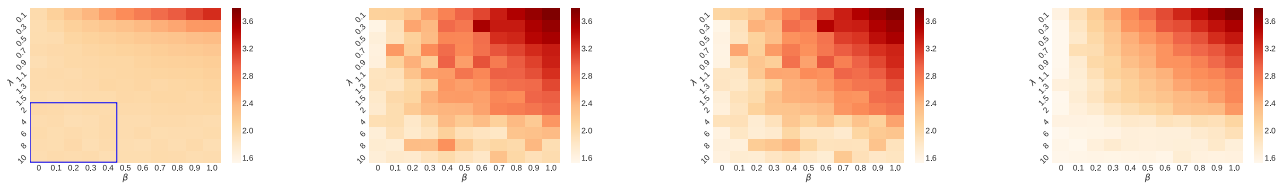

Figure 7. Overestimated  $\mathbf{z}$ ,  $\hat{\lambda} = 1.5$ ,  $\hat{\beta} = 0.5$ . The average RMSE across different values of actual  $\lambda$  and  $\beta$  on PDF dataset. From left to right: *MLSG*, *Lasso*, *Ridge*, *OLS*.

**References**

Higham, N. J. Analysis of the cholesky decomposition of a semi-definite matrix. In *Reliable Numerical Computation*, pp. 161–185. University Press, 1990.

Rosen, J. B. Existence and uniqueness of equilibrium points for concave n-person games. *Econometrica*, pp. 520–534, 1965.
